# Supplementary material for: Modulatory Effects of Estradiol and Its Mixtures with Ligands of GPER and PPAR on MAPK and PI3K/Akt Signaling Pathways and Tumorigenic Factors in Mouse Testis Explants and Mouse Tumor Leydig Cells
Source: MDPI journal article supplement (doi:10.3390/biomedicines10061390), 2022-06-12
Supplement: s1 [file s1]

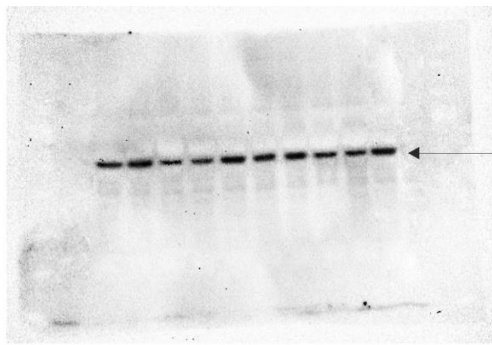

GPER  
55 kDa

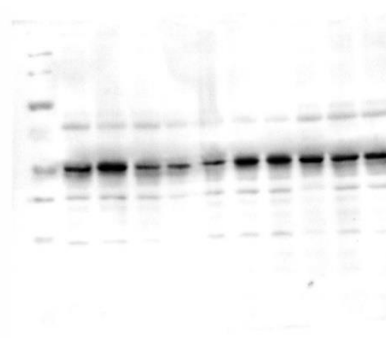

PPAR $\alpha$   
52 kDa

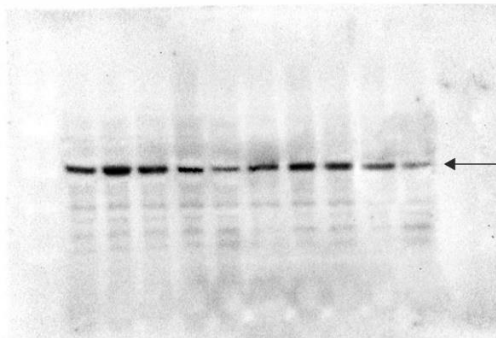

PPAR $\gamma$   
56 kDa

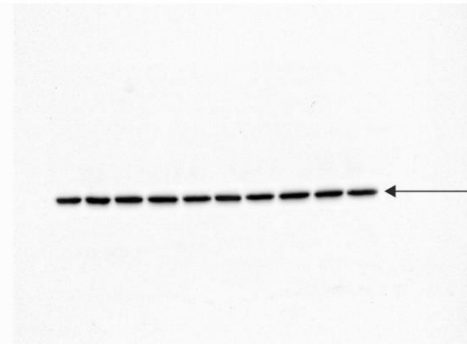

$\beta$ -actin  
42 kDa

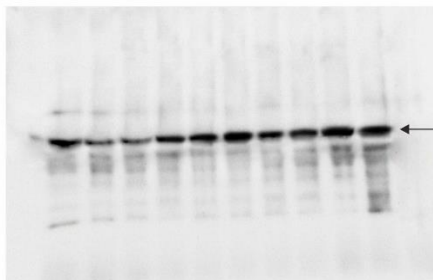

Raf-1  
80 kDa

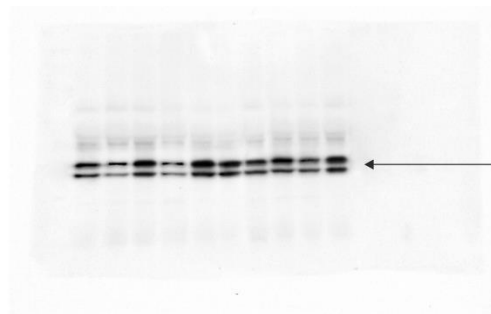

ERK 1/2  
44 kDa  
42 kDa

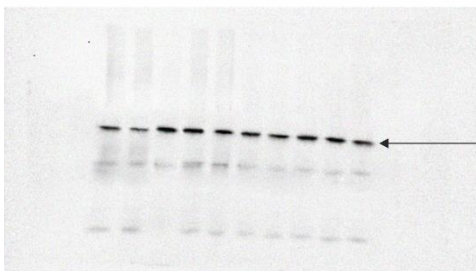

PI3Kp85  
85 kDa

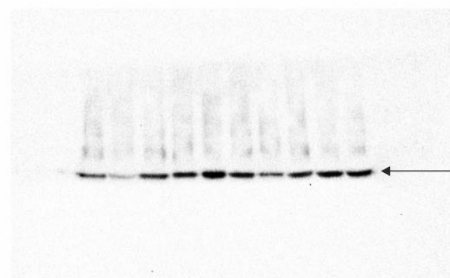

Akt  
60 kDa

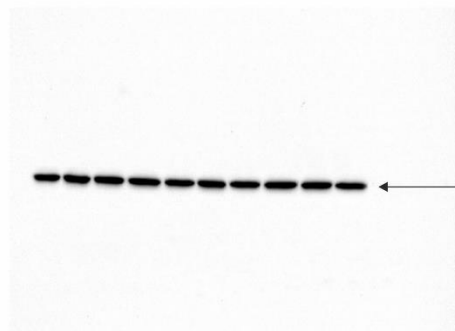

$\beta$ -actin  
42 kDa

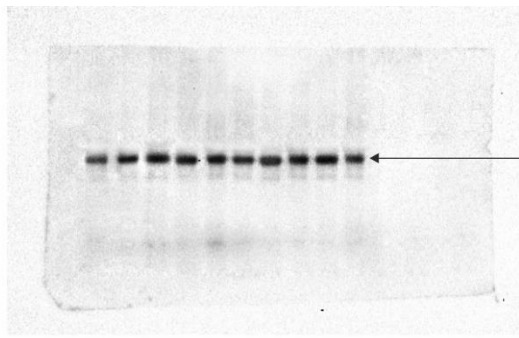

TGF-β  
50 kDa

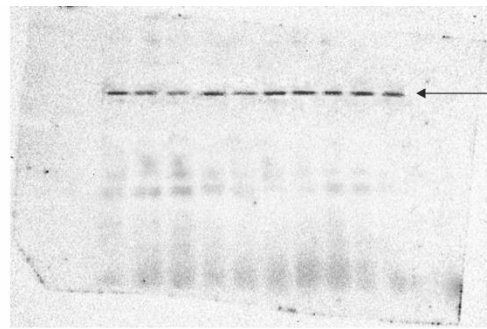

HIF-1α  
93 kDa

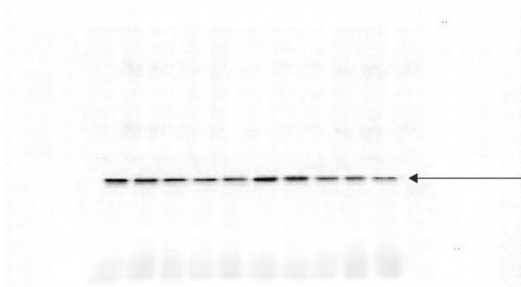

VEGF  
30 kDa

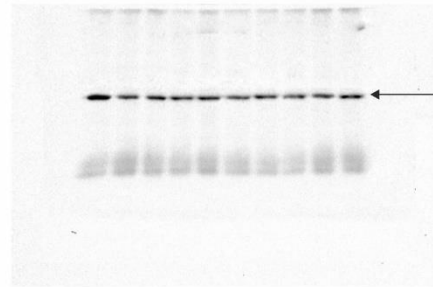

COX-2  
69 kDa

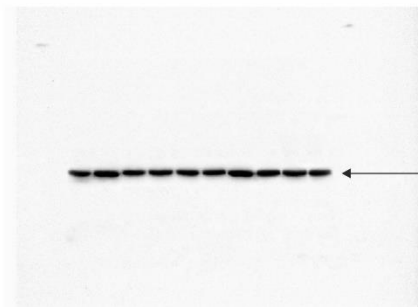

β-actin  
42 kDa

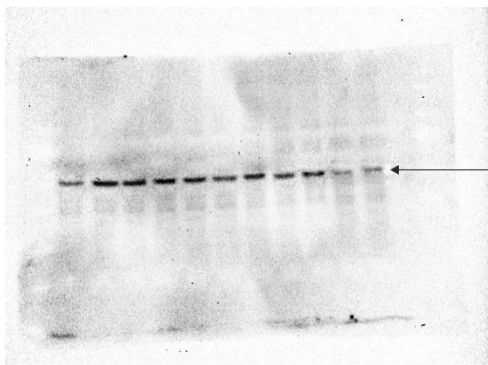

GPER  
55 kDa

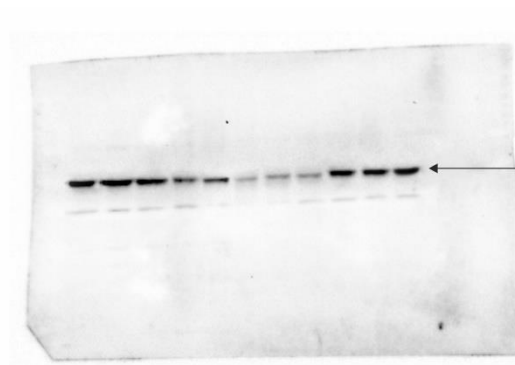

PPARα  
52 kDa

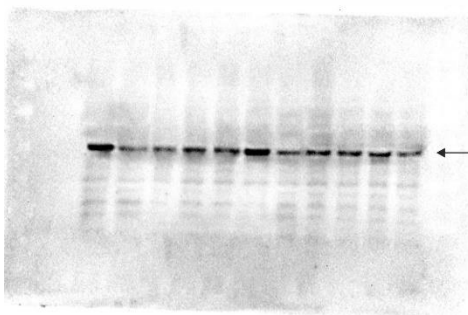

PPARγ  
56 kDa

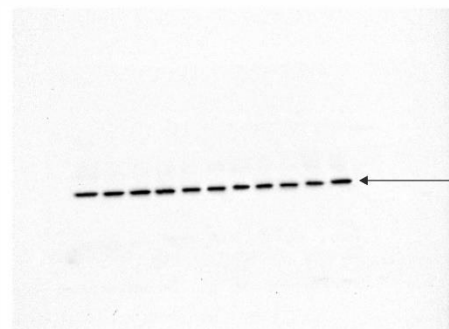

β-actin  
42 kDa

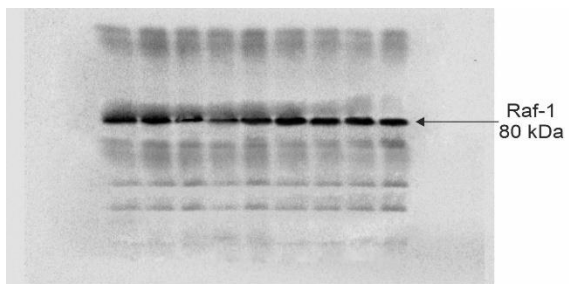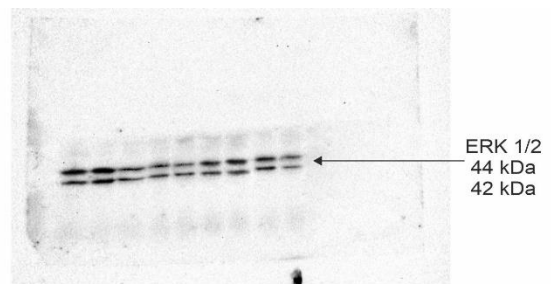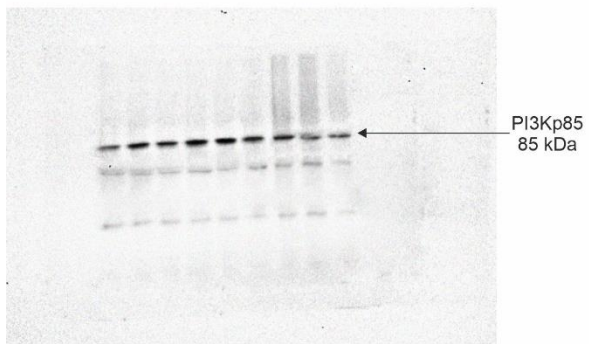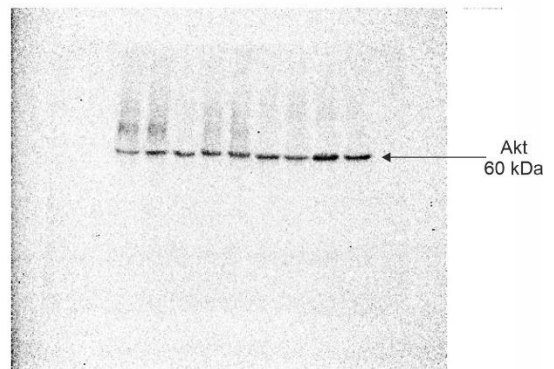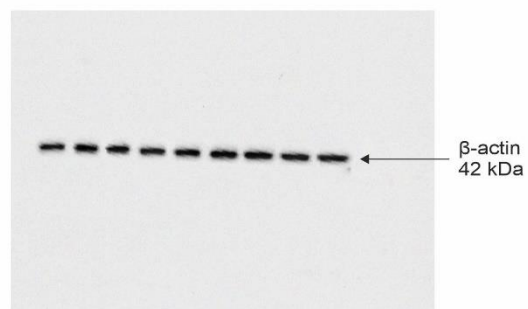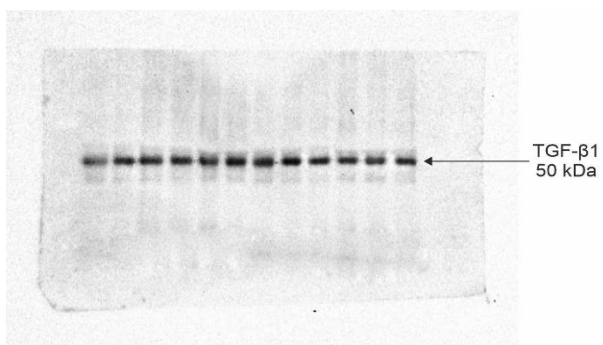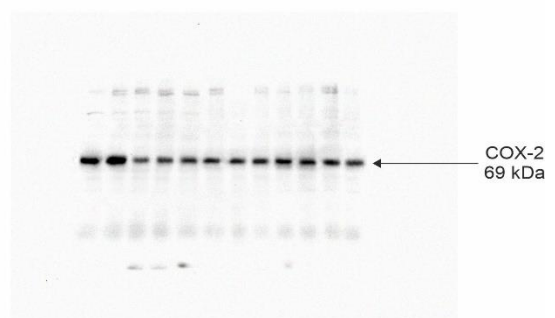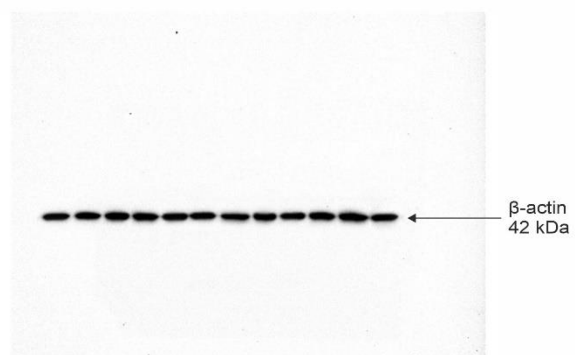

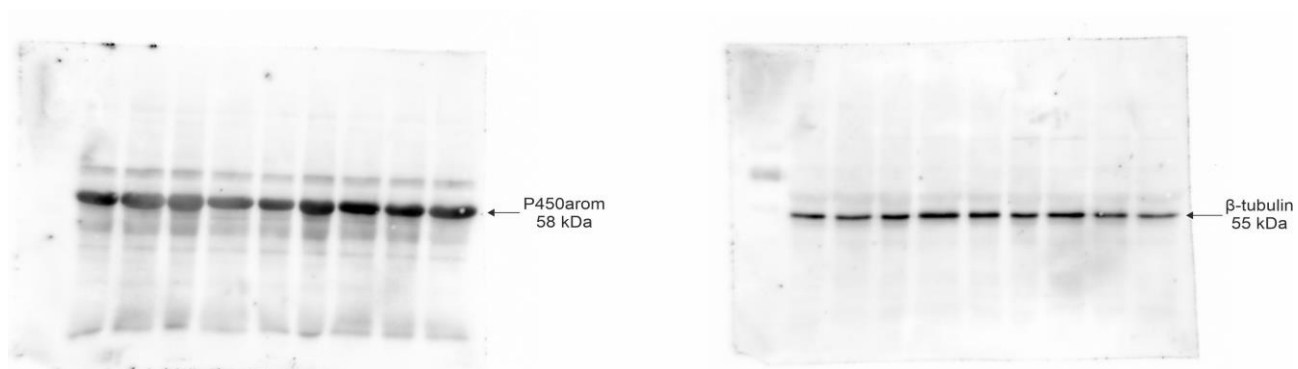

**Figure S1.** Uncropped images of western blots presented in Figures 1–6.
